# Supplementary material for: Galectin-3 impairs calcium transients and β-cell function
Source: Springer Nature journal article supplement (doi:10.1038/s41467-024-47959-1), 2024-05-01
Supplement: MOESM1 [file 41467_2024_47959_MOESM1_ESM.pdf]

## Supplementary information

### Galectin-3 Impairs Calcium Transients and $\beta$ -Cell Function

Qian Jiang<sup>1,2,3,10</sup>, Qijin Zhao<sup>1,2,3,10</sup>, Yibing Chen<sup>1,2,3,10</sup>, Chunxiao Ma<sup>1,2,3,10</sup>, Xiaohong Peng<sup>4,5</sup>, Xi Wu<sup>6,7</sup>, Xingfeng Liu<sup>1,2,3</sup>, Ruoran Wang<sup>8</sup>, Shaocong Hou<sup>1,2,3</sup>, Lijuan Kong<sup>1,2,3</sup>, Yanjun Wan<sup>1,2,3</sup>, Shusen Wang<sup>9</sup>, Zhuo-Xian Meng<sup>8</sup>, Bing Cui<sup>1,2,3</sup>, Liangyi Chen<sup>4,5,7</sup>, Pingping Li<sup>1,2,3\*</sup>

## Supplementary figures

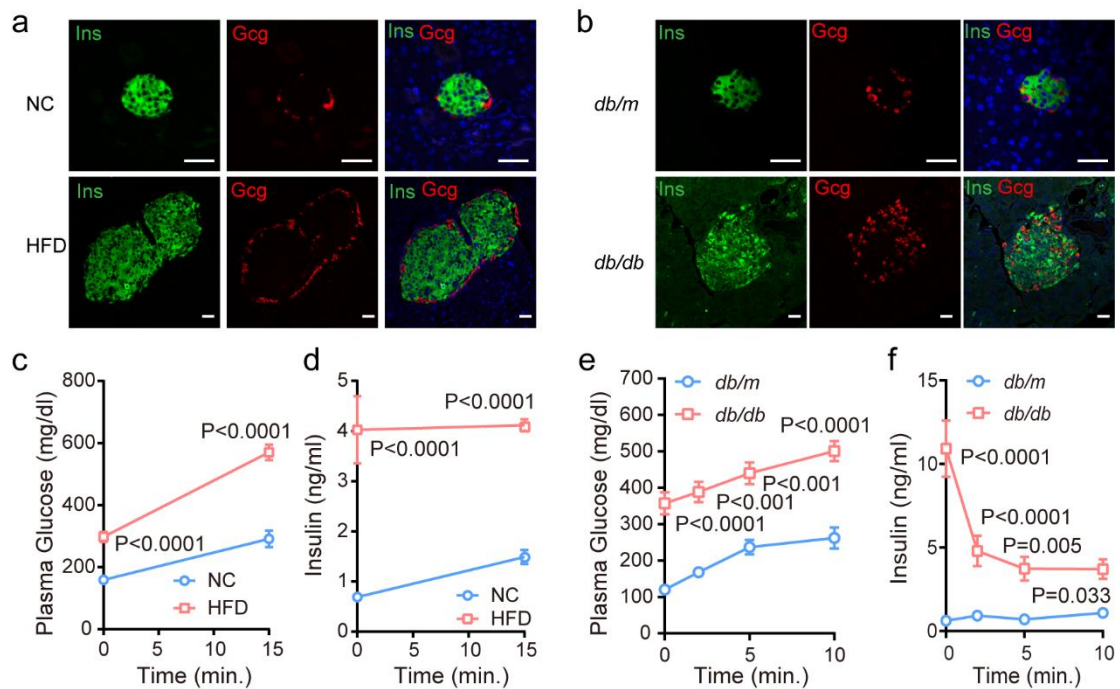

**Supplementary Fig. 1  $\beta$ -cell function was decreased in HFD-fed and *db/db* mice. a,** Immunohistochemistry analysis of insulin (green) and glucagon (red) in pancreas of NC and HFD-fed mice. **b,** Immunohistochemistry analysis of insulin (green) and glucagon (red) in pancreas of *db/m* and *db/db* mice. **c-d,** IPGTT (**c**,  $n = 5$  mice) and first-phase insulin secretion (**d**,  $n = 7$  mice) in NC and HFD-fed mice after 6 h of fasting. **e-f,** IPGTT (**e**) and first-phase insulin secretion (**f**) in *db/m* and *db/db* mice after 6 h of fasting. Data were analyzed by two-sided Student's *t*-test without adjustments for multiple comparisons. All data are presented as the mean  $\pm$  SEM. Source data are provided as Source Data file.  $n = 6$  islets in 4 pancreatic sections (**a-b**),  $n = 5$  *db/m* mice,  $n = 9$  *db/m* mice (**e-f**). NC mice: 20 weeks of age, HFD: 12 weeks feeding from 8 weeks of age; *db/m* and *db/db* mice: 28 weeks of age (**a-f**). Scale bar, 20  $\mu$ m.

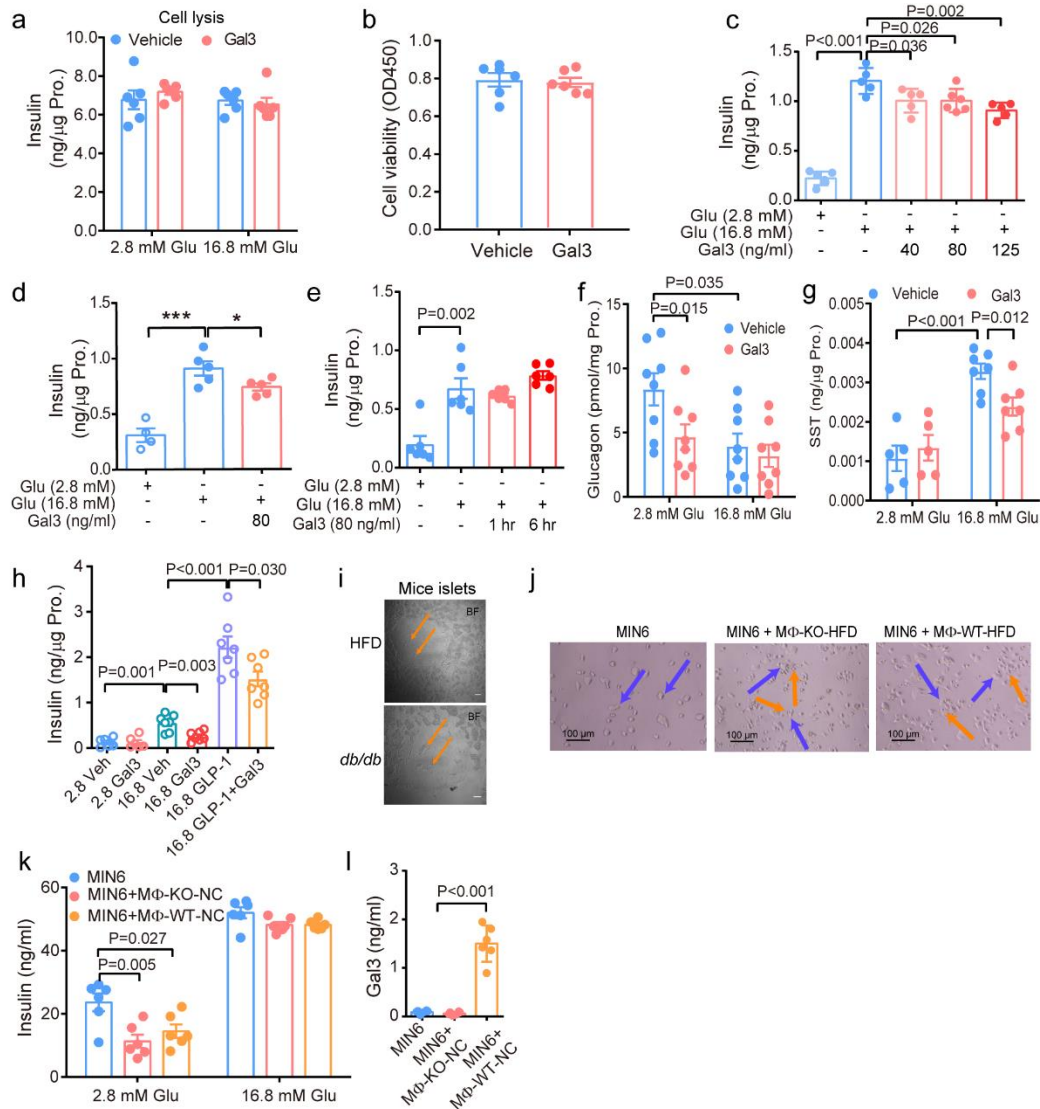

**Supplementary Fig. 2 MIN6 cells coculture with MΦ from NCD mice.** **a**, Insulin content in MIN6 cells during GSIS with Gal3 (80 ng/ml, 6 h) treatment. **b**, Cell viability of MIN6 cells with vehicle or Gal3 (125 ng/ml, 6 h) treatment. **c**, GSIS in MIN6 cells with Gal3 (40, 80, 125 ng/ml, 6 h) treatment. **d**, GSIS in MIN6 cells with Gal3 (80 ng/ml, 1 h) treatment. **e**, Effect of Gal3 (80 ng/ml) on GSIS in MIN6 cells with Gal3 treatment in DMEM culture medium for 1 h or 6 h, followed by washing twice with 2.8 mM KRH buffer and performing GSIS without Gal3. **f-g**, Glucagon (**f**) and somatostatin (**g**) secretion with Gal3 treatment (250 ng/ml, 1 h) in mice islets in the process of GSIS. **h**, GLP-1 (100 nM) stimulated insulin secretion in mice islets with Gal3 (250 ng/ml, 1 h) treatment. **i**, Bright field of HFD-fed and *db/db* mice islets. The yellow arrow points to MΦ. **j**, Bright field of MIN6 cells and MΦ coculture system. The blue arrow points to MIN6 cells, the yellow arrow points to MΦ. The MΦ were

peritoneal macrophages from WT or Gal3 KO mice on HFD feeding. **k**, GSIS in coculture system of MIN6 cells and peritoneal macrophages from WT and Gal3 KO mice on NC-fed. **l**, Gal3 levels in condition medium from coculture system in (**k**). Data were analyzed by two-sided Student's *t*-test without adjustments for multiple comparisons. All data are presented as the mean  $\pm$  SEM. Source data are provided as Source Data file. *n*=6 (**a-b**, **e**, **h**, **k-l**), *n*=5 (**c-d**), *n*=8 (**f**), *n*=7 (**g**) biologically independent cell samples. *n*=3 independent experiment (**i**, **j**). Islets were isolated from 12-week-old NC mice, M $\Phi$  were isolated from 20-week-old NC mice or 12 weeks of HFD-fed mice from 8 weeks of age.

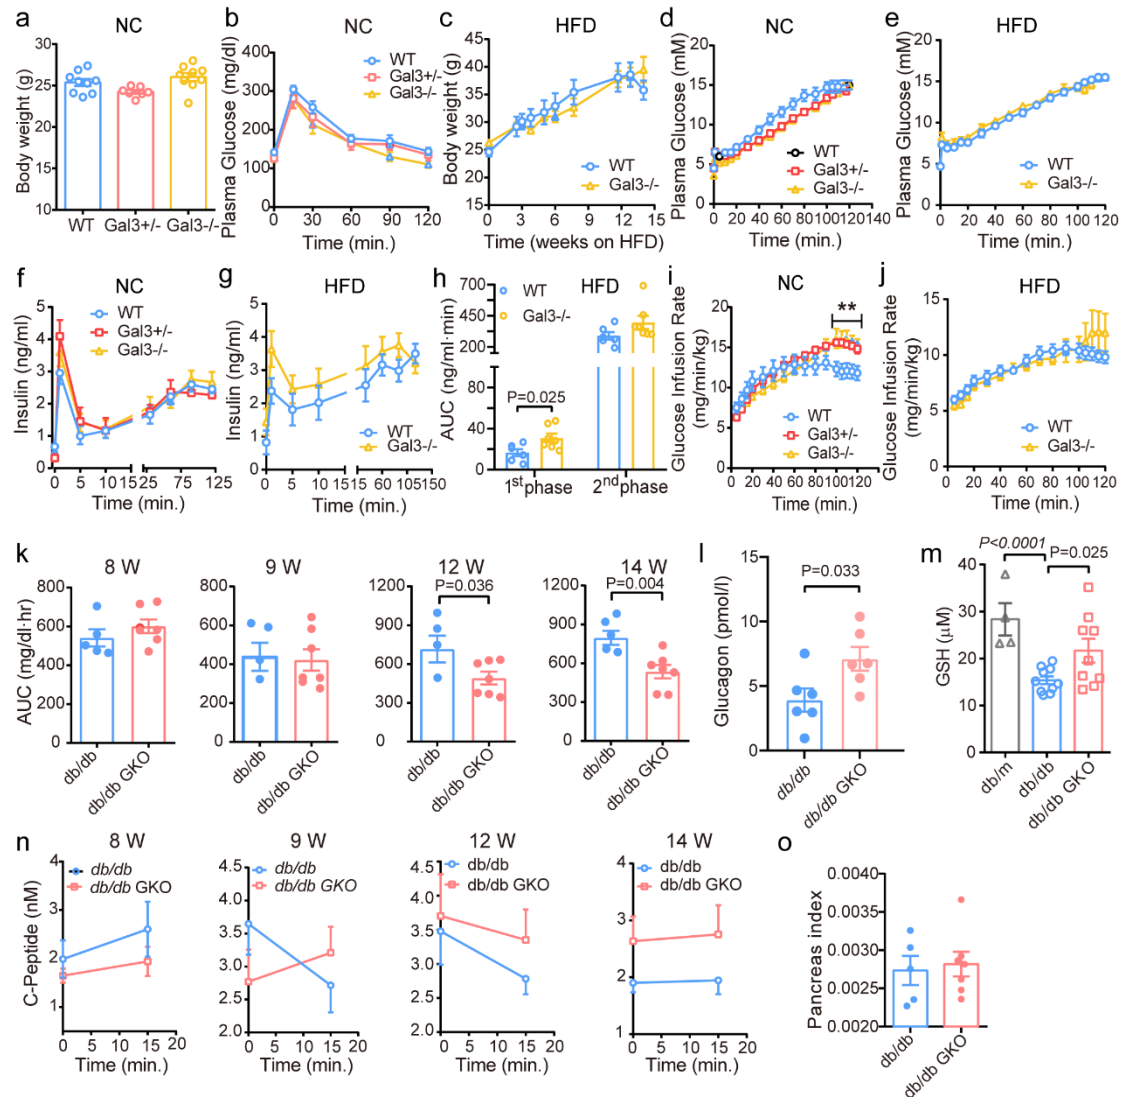

**Supplementary Fig. 3 Metabolic studies in NC, HFD-fed and *db/db* Gal3 KO Mice.**

**a-b**, Body weight (**a**), and IPGTT (**b**) of WT, Gal3+/- and Gal3-/- mice on NC-fed. **c**,

Body weight in HFD-fed WT and Gal3<sup>-/-</sup> mice. **d-e**, Plasma glucose during hyperglycemic clamp study in WT, Gal3<sup>+/-</sup> and Gal3<sup>-/-</sup> mice on NC-fed (**d**) and in HFD-fed WT and Gal3<sup>-/-</sup> mice (**e**). **f**, Insulin level during hyperglycemic clamp study in WT, Gal3<sup>+/-</sup> and Gal3<sup>-/-</sup> mice on NC-fed. **g-h**, Insulin level (**g**) and the AUC of the first phase of insulin secretion (from 0 to 10 min) and the second insulin secretion (from 10 to 120 min) (**h**) during hyperglycemic clamp study in HFD-fed WT and Gal3<sup>-/-</sup> mice. **i-j**, Glucose infusion rate (GIR) during hyperglycemic clamp study in WT, Gal3<sup>+/-</sup> and Gal3<sup>-/-</sup> mice on NC (**i**) and in HFD-fed WT and Gal3<sup>-/-</sup> mice (**j**). **k**, The AUC of IPGTT in *db/db* and *db/db*-Gal3 KO mice (from 8 to 14 weeks of age). **l-m**, Plasma glucagon levels (**l**) and plasma glutathione (GSH) levels (**m**) in *db/db* and *db/db*-Gal3 KO mice (17 weeks of age). **n**, Plasma C-peptide concentration in *db/db* and *db/db*-Gal3 KO mice (from 8 to 14 weeks of age). **o**, Pancreas mass index of *db/db* and Gal3 KO mice (17 weeks of age). Data were analyzed by two-sided Student's *t*-test without adjustments for multiple comparisons. All data are presented as the mean  $\pm$  SEM. Source data are provided as Source Data file. n = 7 Gal3<sup>+/-</sup> mice, n=8 Gal3<sup>-/-</sup> mice, n=9 WT mice (**a-b, d, f, i**); n=10 Gal3<sup>-/-</sup> mice, n=12 WT mice (**c**); n = 6 WT mice, n=8 Gal3<sup>-/-</sup> mice (**e, g-h, j**); n=5 *db/db* mice, n=7 *db/db*-GKO mice (**k, o**); n=6 mice (**l**); n=4 *db/m* mice, n=9 *db/db*-GKO mice, n=10 *db/db* mice (**m**); n=4 *db/db* mice, n=7 *db/db*-GKO mice (**n**). NC mice: 12 weeks old, HFD: 8-12 weeks feeding from 8 weeks of age. P value (**i**): 100 min. p=0.008, 105 min. p=0.006, 110 min. p=0.008, 115 min. p=0.010, 120 min. p=0.018. \*\*p < 0.01.

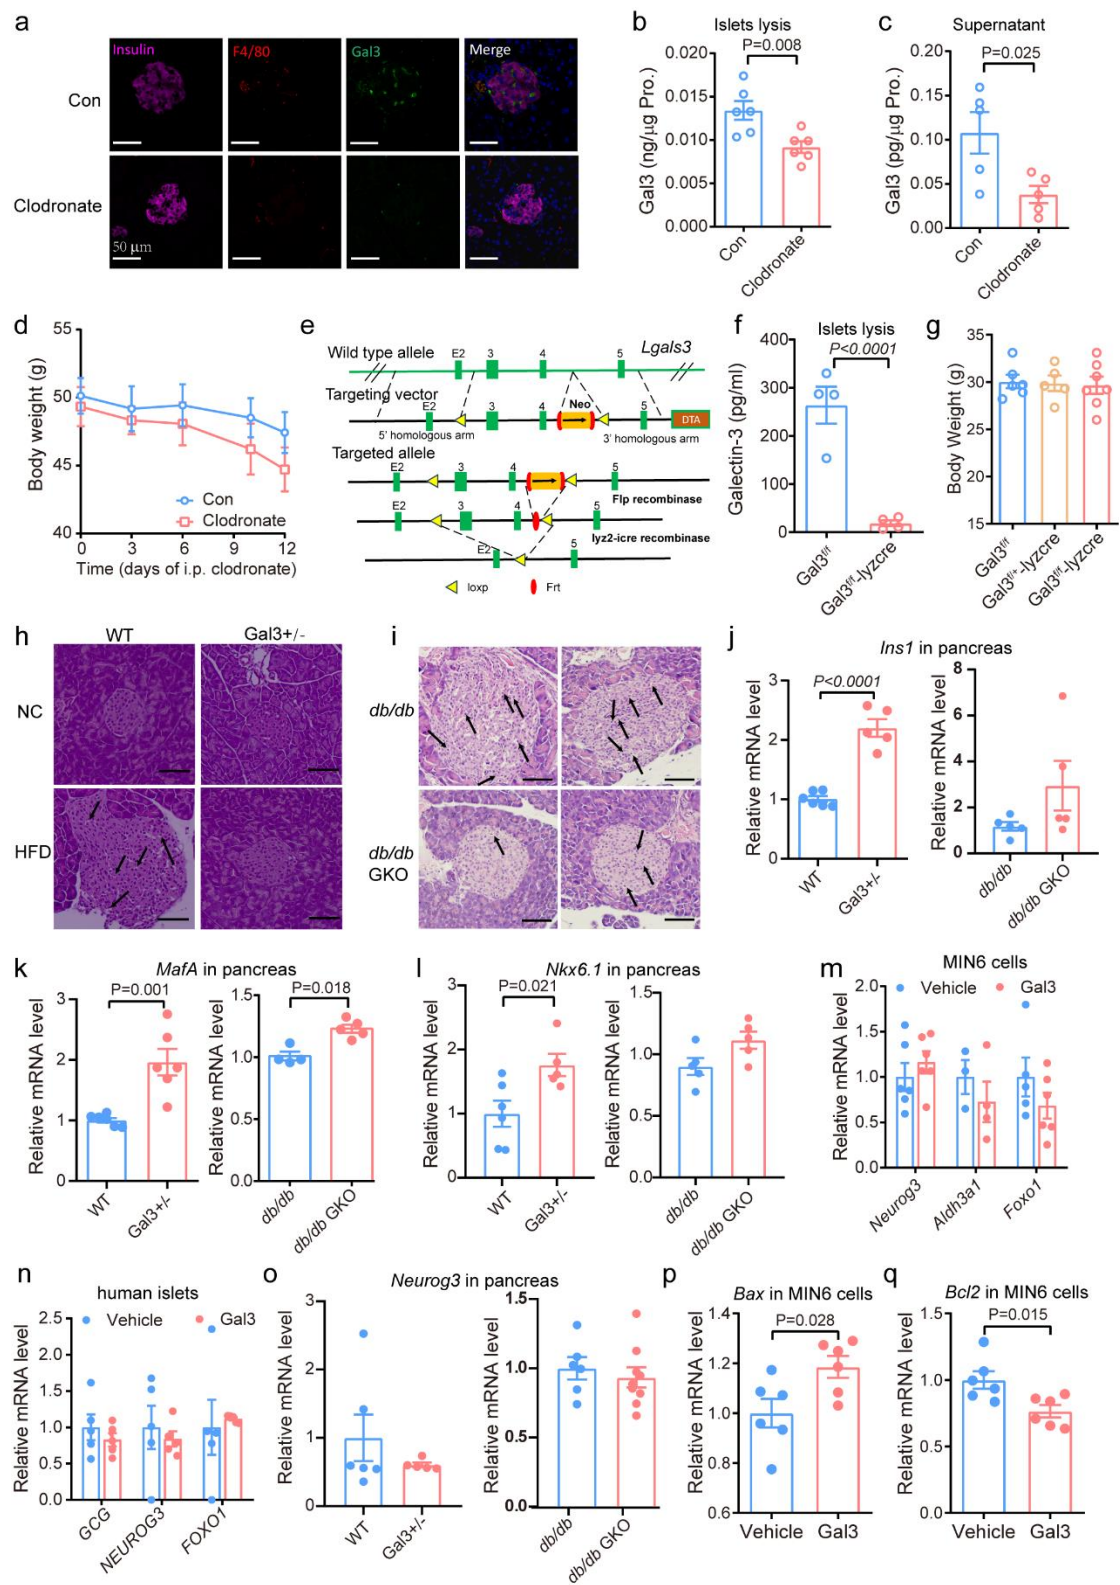

**Supplementary Fig. 4 Gene expression studies about dedifferentiation and inflammation.** **a**, immunofluorescence staining of F4/80 and Gal3 in pancreatic islets,  $n=5$  islets in 5 pancreatic sections, Scale bar,  $50\ \mu\text{m}$ . **b-c**, Gal3 levels in islet (**b**) and

supernatant of islet (**c**) from clodronate- or control-treated HFD mice. **d**, Body weight. **e**, Schematic representation of conditional floxed and deleted *Lgals3* gene loci. **f**, Gal3 levels in islets from HFD-fed mice. **g**, Body weight of HFD-fed mice. HFD: 4 weeks feeding from 8 weeks old. **h-i**, HE staining of pancreatic islets from Gal3<sup>+/-</sup> (**h**, n=5 islets in 4 pancreatic section) and *db/db* mice (**i**, n=6 islets in 4 pancreatic section). The black arrow points to vacuolar degeneration cell. Scale bar, 100  $\mu$ m. **j-l**, mRNA level of *Ins1* (**j**), *Mafa* (**k**) and *Nkx6.1* (**l**) in pancreas from Gal3<sup>+/-</sup> mice on HFD-fed and *db/db* GKO mice. **m**, mRNA level of genes involved in dedifferentiation in MIN6 cells treated with or without Gal3 (80 ng/ml, 24 h). **n**, mRNA level of *GCG*, *NEUROG3* and *FOXO1* in human islets treated with or without Gal3 (250 ng/ml, 24 h). **o**, mRNA level of *Neurog3* in pancreas of HFD-fed WT, Gal3<sup>+/-</sup> mice and *db/db*, *db/db* GKO mice. **p-q**, mRNA level of proapoptotic gene *Bax* (**p**) and anti-apoptotic gene *Bcl2* (**q**) in MIN6 cells treated with or without Gal3 (80 ng/ml, 48 h). HFD (**h**, **g-l**, **o**): 16 weeks feeding from 8 weeks old, *db/db* and *db/db* GKO: 16 weeks old. Data were analyzed by two-sided Student's *t*-test without adjustments for multiple comparisons. All data are presented as the mean  $\pm$  SEM. Source data are provided as Source Data file. n = 6 biologically independent samples (**b-d**, **m-n**, **p-q**); n=4 biologically independent samples (**f**); n=6 mice (Gal3<sup>f/f</sup> and Gal3<sup>f/f</sup> -lyzcre), n=7 mice (Gal3<sup>f/+</sup> -lyzcre) (**g**); n=5 mice (**j-l**, **o**).

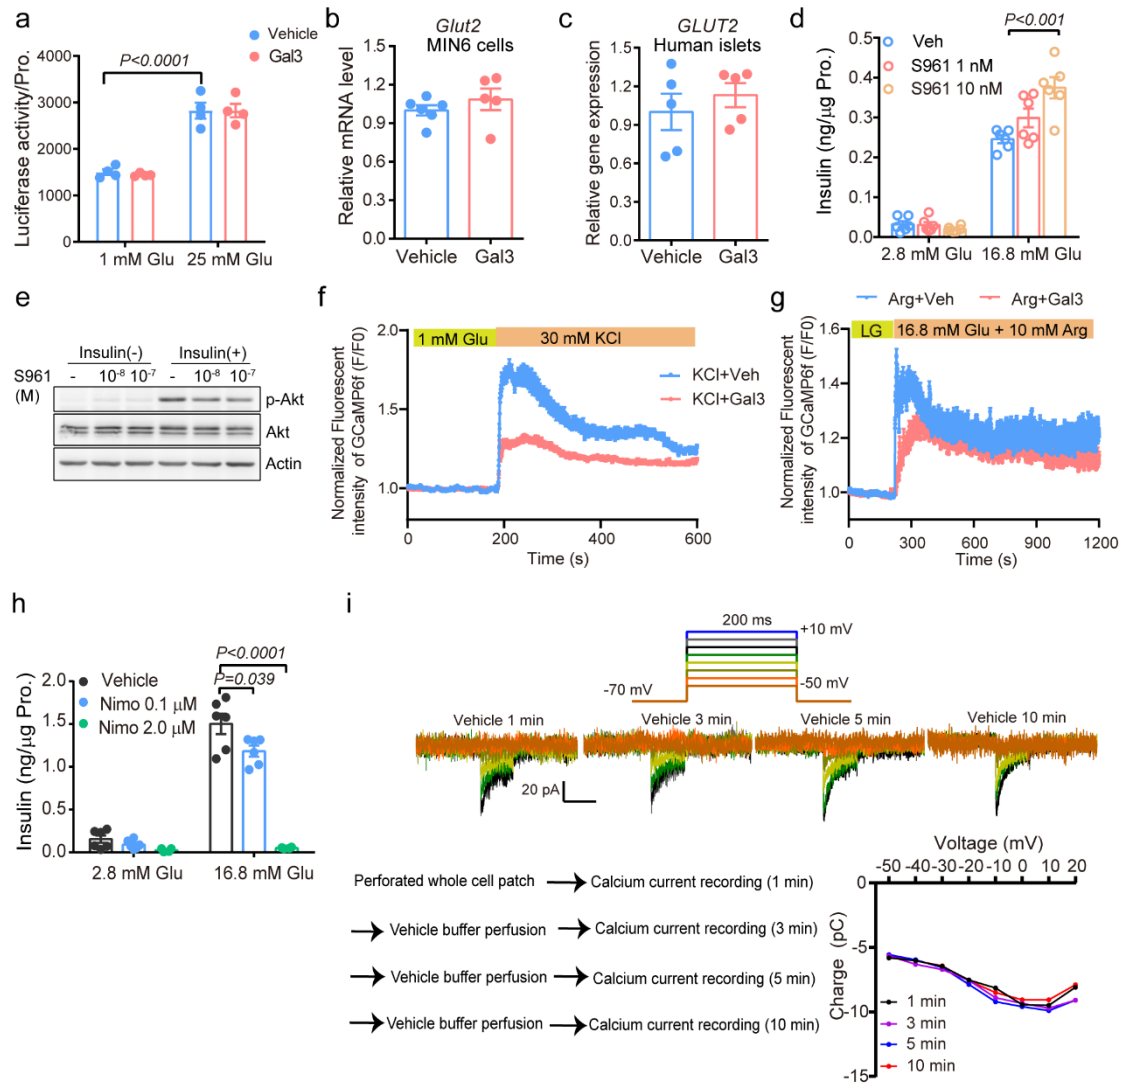

**Supplementary Fig. 5 The effects of Gal3 on glucose uptake and insulin signaling pathway in  $\beta$  cells.** **a**, Effect of Gal3 (80 ng/ml, 1 h) on glucose uptake in MIN6 cells. **b-c**, mRNA levels of *Glut2* genes in MIN6 cells (**b**) and islets from healthy persons (**c**) with or without Gal3 (80 ng/ml, 24 h). **d**, GSIS in MIN6 cells with S961 (1 nM and 10 nM, 1 h) treatment. **e**, Protein levels of AKT and phosphorylation-AKT in HepG2 cells with or without S961 ( $10^{-8}$  M and  $10^{-7}$  M, 6 h) or insulin (10 nM, 30 min). **f**, Typical traces of time-lapse calcium imaging in islets with KCl (30 mM) stimulation and Gal3 (250 ng/ml, 1 h) treatment. **g**, Typical traces of time-lapse calcium imaging in islets with arginine (10 mM) stimulation and Gal3 (250 ng/ml, 1 h) treatment. **h**, GSIS in MIN6 cells with Nimodipine (0.1  $\mu$ M and 2  $\mu$ M, 1 h) treatment. **i**, Ca<sup>2+</sup> current records at a series of point time (1, 3, 5, and 10 min) in single MIN6 cell continuously perfused

with vehicle solution. Data were analyzed by two-sided Student's *t*-test without adjustments for multiple comparisons. All data are presented as the mean  $\pm$  SEM. Source data are provided as Source Data file. n=4 (**a**), n=5 (**b-c**), n=6 (**d**) biologically independent samples; n = 23  $\beta$  cells (**f**); n = 16  $\beta$  cells (**g**). Islets were isolated from 12-week-old NC mice.

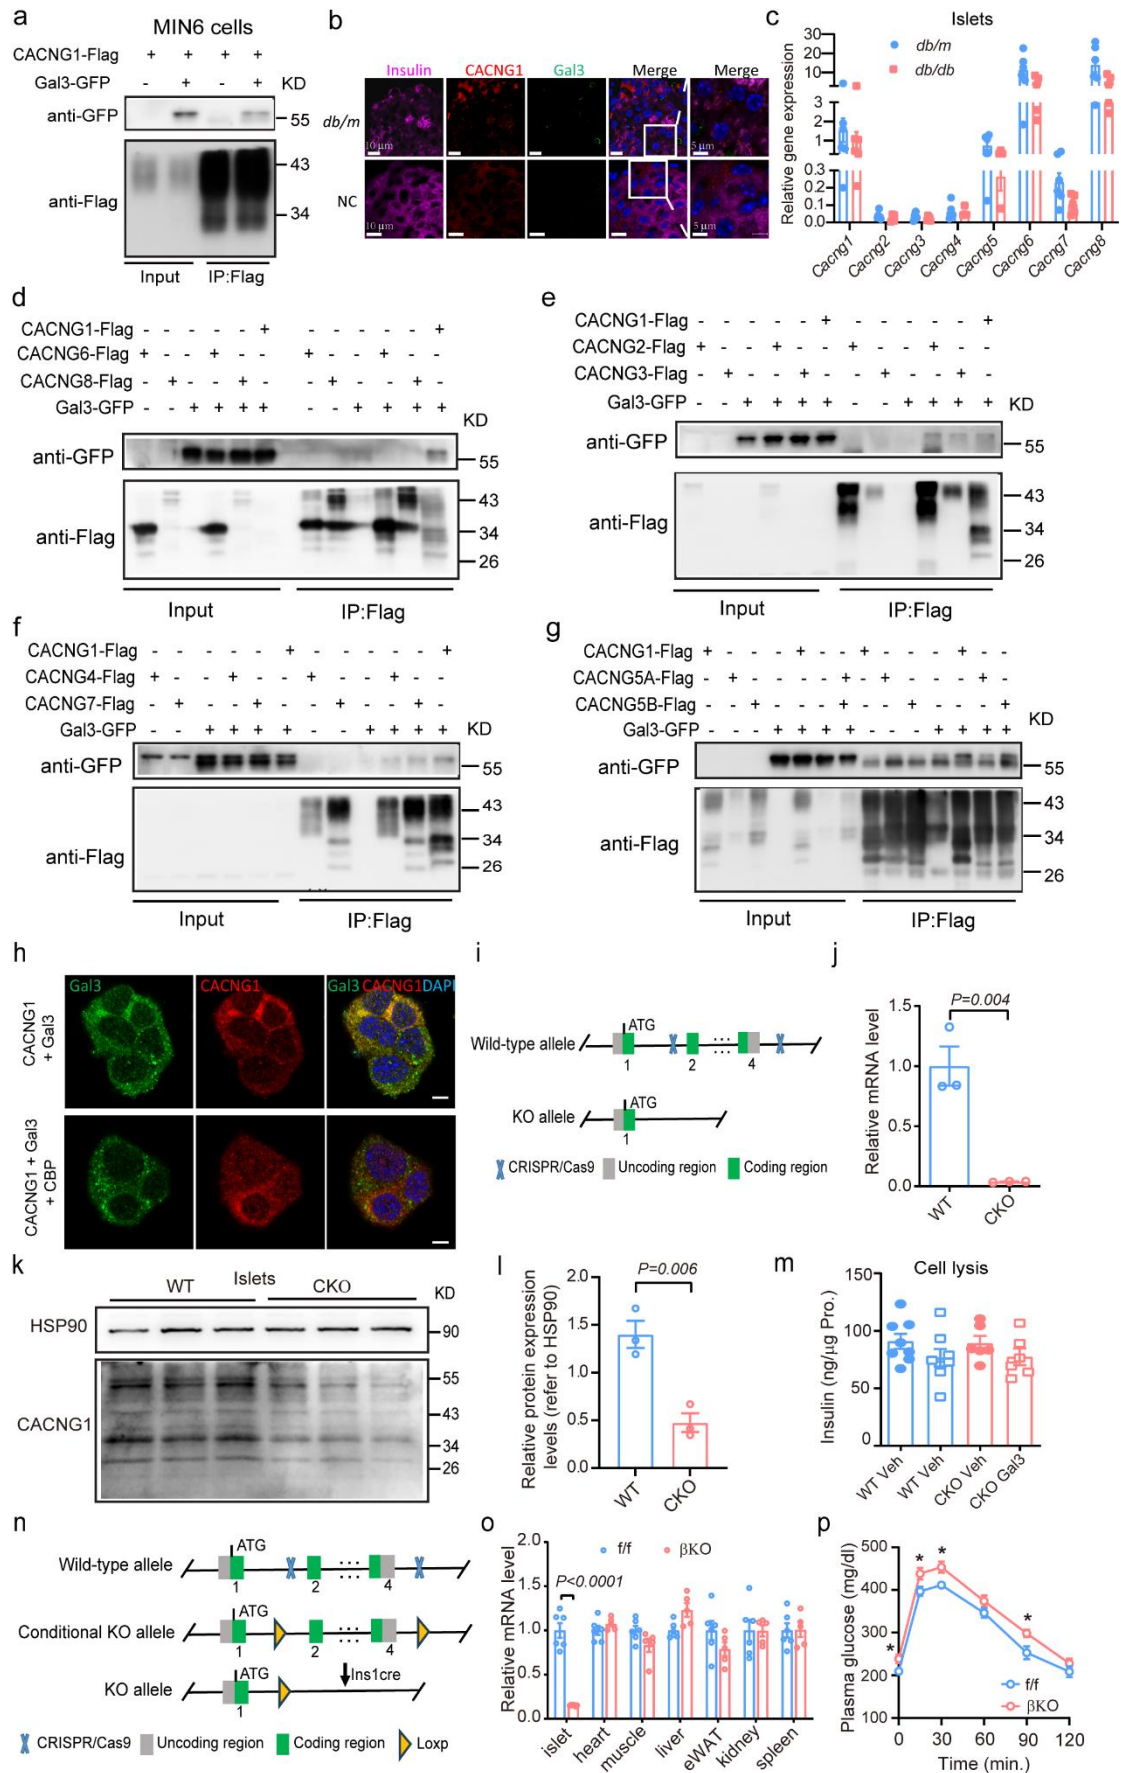

**Supplementary Fig. 6 Gal3 binding with CACNG1.** **a**, Co-immunoprecipitation of Gal3-GFP and flag-tagged CACNG1 in MIN6 cells (n=2 independent experiments). **b**, Colocalization of Gal3 and CACNG1 was detected using antibodies against the endogenous proteins in islets from db/m and NC mice. (NC: 16 weeks old, C57BL6J, male; db/m: 17 weeks old, BKS, male). n=3 islets in 3 pancreatic section. **c**, mRNA levels of the *Cacng* family in islets of *db/db* mice, n=6 mice (12 weeks old). **d-g**, Co-immunoprecipitation of Gal3 and CACNG6, CACNG8 (**d**), CACNG2, CACNG3 (**e**), CACNG4, CACNG7 (**f**), CACNG5A, CACNG5B (**g**) in 293T cells. n=1 independent experiments (**d-g**). **h**, Confocal image of Gal3 colocalization with CACNG1 by double immunostaining in MIN6 cells. Scale bar, 5  $\mu$ m. n=3 independent experiments. **i**, Schematic representation of WT and deleted *Cacng1* gene loci. **j**, *Cacng1* gene expression in islets from WT and *Cacng1* knockout (CKO) mice. **k-l**, CACNG1 protein levels in mouse islets from WT and CKO mice (n=3 biologically independent samples). **m**, Insulin content in islets during GSIS with or without Gal3 (250 ng/ml, 1 h) (n=8 WT, n=6 CKO biologically independent samples). **n**, Schematic representation of WT, conditional floxed and deleted *Cacng1* gene loci. **o**, *Cacng1* gene expression in tissues from *Cacng1<sup>f/f</sup>* and *Cacng1<sup>βKO</sup>* mice (n=6 mice). **p**, IPGTT of *Cacng1<sup>f/f</sup>* and *Cacng1<sup>βKO</sup>* mice (n=11 mice, HFD: feeding 4 weeks from 10 weeks of age. 0 min, P=0.024, 15 min, P=0.026, 30 min, P=0.012, 90 min, P=0.019). Data were analyzed by two-sided Student's *t*-test without adjustments for multiple comparisons. All data are presented as the mean  $\pm$  SEM. Source data are provided as Source Data file. Mice were 10 weeks old (**j-m, o**). \*p < 0.05.

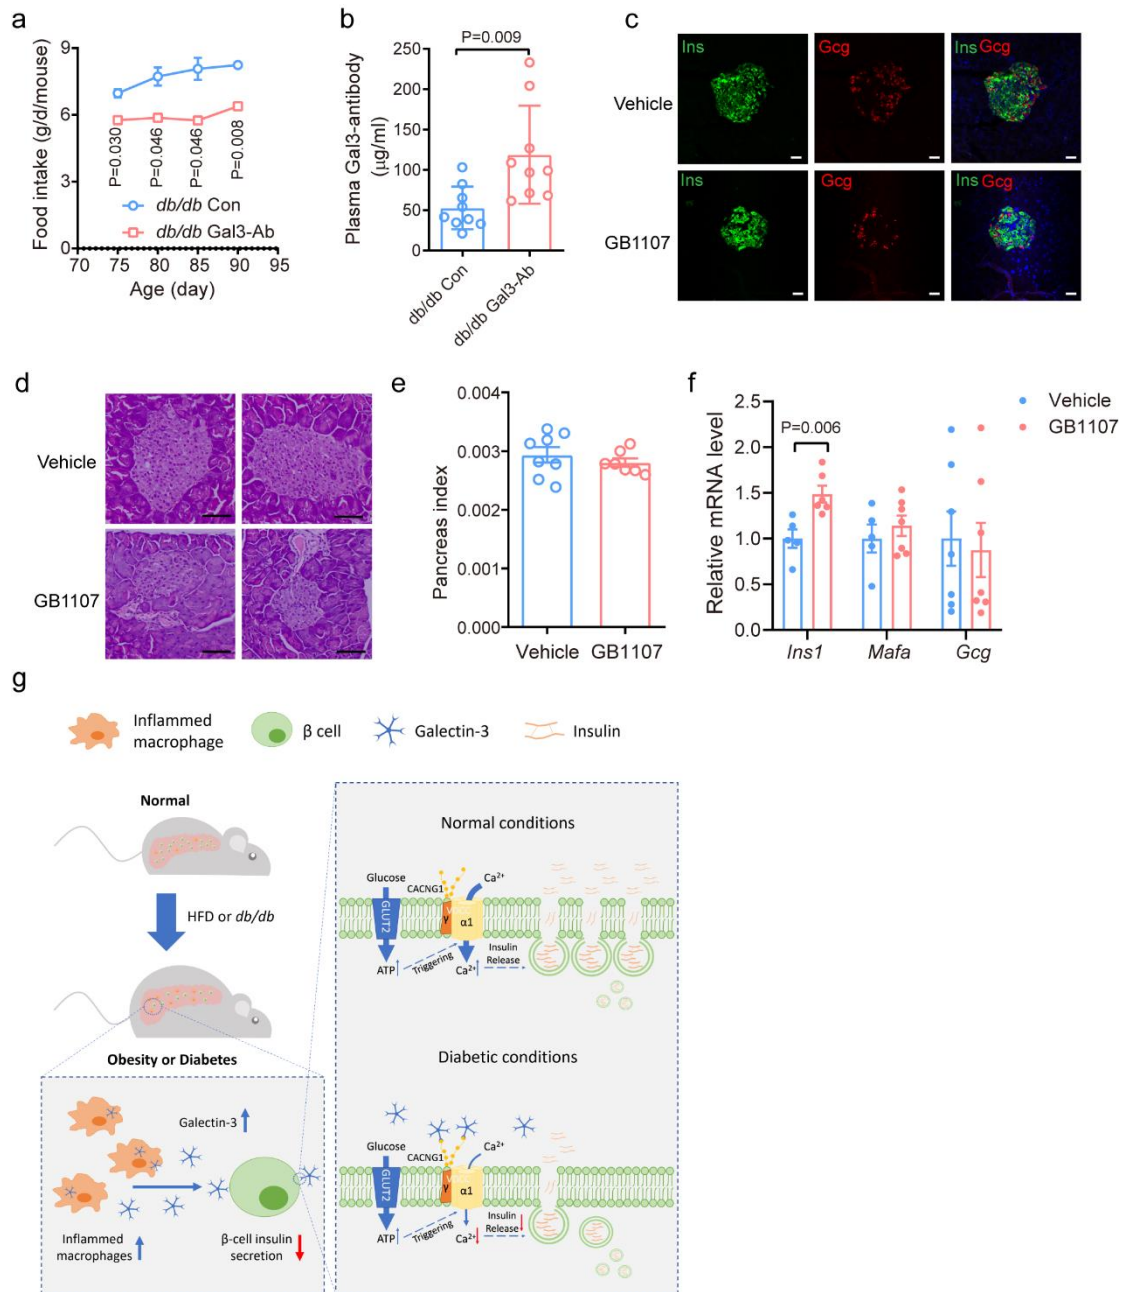

**Supplementary Fig. 7 Histology and Gene Expression Studies of pancreas in *db/db* mice.** **a-b**, Food intake (**a**,  $n=10$  mice) and Blood Gal3 antibody levels (16 weeks of age) (**b**,  $n=9$  mice) in *db/db* mice. **c**, Immunohistochemistry analysis of insulin (green) and glucagon (red) in pancreas of *db/db* mice. Scale bar, 20  $\mu$ m. **d**, HE staining of pancreas from *db/db* mice. Scale bar, 100  $\mu$ m. **e**, Pancreas mass index of *db/db* mice ( $n=8$  mice). **f**, mRNA level of *Ins1*, *Mafa* and *Gcg* in pancreas from *db/db* mice. **g**, Graphic summary on Gal3 impairing calcium transients and  $\beta$ -cell function. Data were analyzed by two-sided Student's *t*-test without adjustments for multiple comparisons.

All data are presented as the mean  $\pm$  SEM. Source data are provided as Source Data file. n = 5 islets in 5 pancreatic sections (**c-d**), n = 5 (*Ins1* and *Mafa*), n=7 (*Gcg*) biologically independent samples (**f**). Mice were 11 weeks old (**c-f**).

## Supplementary tables

Supplementary Table 1 Key resources table

| Reagent or Resource                           | Source                    | Identifier       |
|-----------------------------------------------|---------------------------|------------------|
| Antibodies                                    |                           |                  |
| Rabbit anti-CD11c                             | Cell Signaling Technology | Cat# 97585       |
| Guinea pig anti-insulin                       | Abcam                     | Cat# ab7842      |
| Rat anti-insulin                              | R&D Systems               | Cat# MAB1417     |
| Rabbit anti-glucagon                          | Cell Signaling Technology | Cat# 2760        |
| Mouse anti-galectin3                          | Abcam                     | Cat# ab2785      |
| Rabbit anti-CACNG1                            | LSBio                     | Cat# LS-C805513  |
| Rat anti-F4/80                                | Abcam                     | Cat# ab6640      |
| Mouse anti-flag Tag                           | MBL                       | Cat# M185        |
| Rabbit anti-GFP Tag                           | MBL                       | Cat# 598         |
| Rabbit anti-Phospho S473 Akt                  | Cell Signaling Technology | Cat# 4060        |
| Rabbit anti-Akt                               | Cell Signaling Technology | Cat# 4691        |
| Mouse anti-beta actin                         | Proteintech               | Cat# 66009-1-1g  |
| Chemicals, Peptides, and Recombinant Proteins |                           |                  |
| 60% high-fat diet                             | Research Diets            | Cat# D12492      |
| Collagenase, Type V                           | Sigma-Aldrich             | Cat# C9263       |
| Galectin-3 protein                            | R&D Systems               | Cat# 1197-GA-050 |
| Galectin-3-GFP protein                        | This paper                | N/A              |
| L-Arginine                                    | Sigma-Aldrich             | Cat# A5131       |
| GLP-1 (7-36)                                  | MCE                       | Cat# HY-P0054    |
| TRIzol RNA isolation reagent                  | Thermo Fisher Scientific  | Cat# 15596026    |
| RNA purification kit                          | QIAGEN                    | Cat# 74104       |
| iTaq SYBR Green supermix                      | Bio-Rad Laboratories      | Cat# 1725121     |
| High-capacity cDNA reverse transcription kit  | Thermo Fisher Scientific  | Cat# 4368813     |
| GB1107                                        | MCE                       | Cat# HY114409    |
| TD139                                         | Selleckchem               | Cat# S0471       |
| Galectin-3 inhibitor Cpd47                    | Merck                     | N/A              |
| Cacng1 blocking peptide                       | Alomone labs              | Cat# BLP-CC111   |
| Nimodipine                                    | Sigma-Aldrich             | Cat# N149        |
| S961                                          | Phoenix Pharmaceuticals   | Cat# 051-86      |

|            |                                           |                |
|------------|-------------------------------------------|----------------|
| Clodronate | Yeasen Biotechnology (Shanghai) Co., Ltd. | Cat# 40337ES10 |
|------------|-------------------------------------------|----------------|

#### Critical Commercial Assays

|                              |                               |                    |
|------------------------------|-------------------------------|--------------------|
| Mouse insulin ELISA kit      | ALPCO                         | Cat# 80-INSMSU-E10 |
| Rat insulin ELISA kit        | ALPCO                         | Cat# 80-INSRTU-E10 |
| Human insulin ELISA kit      | Mercodia                      | Cat# 10-1132-01    |
| Mouse glucagon ELISA kit     | EASYBIO                       | Cat# 10-1281-01    |
| Mouse somatostatin ELISA kit | Phoenix Pharmaceuticals, Inc. | Cat# EK-060-03     |
| Mouse C-Peptide ELISA kit    | ALPCO                         | Cat# 80-CPTMS-E01  |
| Mouse Galectin-3 ELISA kit   | Aviscera Bioscience           | Cat# SK00199-03    |
| ATP ELISA kit                | Promega                       | Cat# FF2000        |
| Glucose Uptake-Glo™ Assay    | Promega                       | Cat# J1343         |
| Cell Counting Kit-8          | DOJINDO                       | Cat# CK17          |
| GSH Kit                      | Beyotime                      | Cat# S0053         |

#### Experimental Models: Cell Lines

|                         |                                                                          |            |
|-------------------------|--------------------------------------------------------------------------|------------|
| MIN6                    | Gift from Dr. Xu in Institute of Biophysics, Chinese Academy of Sciences | N/A        |
| INS1                    | ACCEGEN                                                                  | ABC-TC232S |
| HEK293T                 | ATCC                                                                     | N/A        |
| Human Pancreatic Islets | Tianjin First Central Hospital                                           | N/A        |
| Mouse Pancreatic Islets | This paper                                                               | N/A        |

#### Experimental Models: Organisms/Strains

|                            |                                              |  |
|----------------------------|----------------------------------------------|--|
| C57BL6/J                   | Shanghai Research Center For Model Organisms |  |
| Gal3 KO mice               | This paper                                   |  |
| <i>db/db</i> -Gal3 KO mice | This paper                                   |  |
| <i>db/db</i> mice          | GemPharmatech Co, Ltd                        |  |

#### Recombinant DNA

|                                    |         |               |
|------------------------------------|---------|---------------|
| cacng1 c-myc plasmid               | Origene | Cat# MR220452 |
| cacng5 tv1 c-myc DDK mouse plasmid | Origene | Cat# MR228935 |
| cacng5 tv2 c-myc DDK mouse plasmid | Origene | Cat# MR219914 |

#### Software and Algorithms

|        |     |                                                                     |
|--------|-----|---------------------------------------------------------------------|
| ImageJ | NIH | <a href="https://imagej.nih.gov/ij/">https://imagej.nih.gov/ij/</a> |
|--------|-----|---------------------------------------------------------------------|

|       |          |                                                                 |
|-------|----------|-----------------------------------------------------------------|
| Prism | Graphpad | <a href="https://www.graphpad.com">https://www.graphpad.com</a> |
|-------|----------|-----------------------------------------------------------------|

Supplementary Table 2 Primer sequences for mouse genes qPCR. Related to Fig. 1, Fig. 2 and Supplementary Fig.4.

| gene          | Forward primer (5'-3')       | Reverse primer (5'-3')   |
|---------------|------------------------------|--------------------------|
| <i>Lgals3</i> | AGACAGCTTTTCGCTTAACGA        | GGGTAGGCACTAGGAGGAGC     |
| <i>Adgre1</i> | CTTTGGCTATGGGCTTCCAGTC       | GCAAGGAGGACAGAGTTTATCGTG |
| <i>Itgax</i>  | CTGGATAGCCTTTCTTCTGCTG       | GCACACTGTGTCCGAACTCA     |
| <i>Ccl2</i>   | TAAAAACCTGGATCGGAACCA<br>AA  | GCATTAGCTTCAGATTTACGGGT  |
| <i>Ccl5</i>   | TTTGCCTACCTCTCCCTCG          | CGACTGCAAGATTGGAGCACT    |
| <i>Il6</i>    | CTGCAAGAGACTTCCATCCAG        | AGTGGTATAGACAGGTCTGTGG   |
| <i>Tnfα</i>   | CAGGCGGTGCCTATGTCTC          | CGATCACCCCGAAGTTCAGTAG   |
| <i>Il-1β</i>  | TGGCAACTGTTCTGAACTCAA        | AGCAGCCCTTCATCTTTTGG     |
| <i>Il10</i>   | GCCAAGCCTTATCGGAAATG         | CACCCAGGGAATTCAAATGC     |
| <i>Arg1</i>   | CTCCAAGCCAAAGTCCTTAGAG       | AGGAGCTGTCATTAGGGACATC   |
| <i>Mrc1</i>   | CTCTGTTTCAGCTATTGGACGC       | CGGAATTTCTGGGATTCAGCTTC  |
| <i>Tgfb1</i>  | TAAAGAGGTCACCCGCGTGCTA<br>AT | ACTGCTTCCCGAATGTCTGACGTA |

Supplementary Table 3 Primer sequences for mouse genes qPCR. Related to Fig. 4 and Supplementary Fig. 4.

| gene           | Forward primer (5'-3') | Reverse primer (5'-3') |
|----------------|------------------------|------------------------|
| <i>Ins1</i>    | GCTTCTTCTACACCCCATGTC  | AGCACTGATCTACAATGCCAC  |
| <i>Mafa</i>    | CTGGAGGATCTGTACTGGATGA | CGCACGGACATGGATACCA    |
| <i>Nkx6.1</i>  | CTGCACAGTATGGCCGAGATG  | CCGGGTTATGTGAGCCCAA    |
| <i>Neurog3</i> | CCAAGAGCGAGTTGGCACT    | CGGGCCATAGAAGCTGTGG    |
| <i>Foxo1</i>   | ATGCTCAATCCAGAGGGAGG   | ACTCGCAGGCCACTTAGAAAA  |
| <i>Bax</i>     | TGAAGACAGGGGCCTTTTTG   | AATTCGCCGGAGACACTCG    |
| <i>Bcl2</i>    | GTCGCTACCGTCGTGACTTC   | CAGACATGCACCTACCCAGC   |
| <i>Glut2</i>   | TCAGAAGACAAGATCACCGGA  | GCTGGTGTGACTGTAAGTGGG  |

Supplementary Table 4 Primer sequences for mouse genes qPCR. Related to Supplementary Fig. 6.

| gene          | Forward primer (5'-3')  | Reverse primer (5'-3') |
|---------------|-------------------------|------------------------|
| <i>Cacng1</i> | GCGCATTCTGTCTTCGGGAA    | TACGCTTCACCGACTGCCTCAT |
| <i>Cacng2</i> | ACGAAGCTGACACCGCAGAGTA  | TGGCGTGTCTTGTAGAACTCGC |
| <i>Cacng3</i> | CTTTCCGAGGCGTGTGCAAGAA  | AGAGTGACGCTGAGGATGGGAA |
| <i>Cacng4</i> | GGAGGATCTACAGCCGCAAGAA  | TCGCCCGTGTGCTGGAAATGT  |
| <i>Cacng5</i> | GCTCAACAGAACCAAGGATGCAG | CATGTCCTCAGCAGTGTACCTC |
| <i>Cacng6</i> | GTGGAAGGTGTGCATCAAGCGA  | CTTGGTGGTTCGCTGGAAGATG |

|               |                         |                        |
|---------------|-------------------------|------------------------|
| <i>Cacng7</i> | CAACTTGGTGACGGAAAACACGG | CGAACGCAAGAATGGTCCTCTG |
| <i>Cacng8</i> | CTCACAGCAGGTGATGACGGAC  | GGTTGATCTTCACGCAGACACC |

Supplementary Table 5 Primer sequences for human genes qPCR.

| gene           | Forward primer (5'-3')  | Reverse primer (5'-3') |
|----------------|-------------------------|------------------------|
| <i>LGALS3</i>  | ATGGCAGACAATTTTCGCTCC   | GCCTGTCCAGGATAAGCCC    |
| <i>GCG</i>     | CTGAAGGGACCTTTACCAGTGA  | CCTGGCGGCAAGATTATCAAG  |
| <i>NEUROG3</i> | CTAAGAGCGAGTTGGCACTGA   | GAGGTTGTGCATTCGATTGCG  |
| <i>FOXO1</i>   | TCGTCATAATCTGTCCCTACACA | CGGCTTCGGCTCTTAGCAAA   |
| <i>GLUT2</i>   | GCTGCTCAACTAATCACCATGC  | TGGTCCCAATTTGAAAACCCC  |

Supplementary Table 6 Information of donors for providing islets. Related to Fig. 7

| Group    | Age   | Gender | BMI     | HbA1c |
|----------|-------|--------|---------|-------|
| Normal   | 20-30 | Male   | >24     | NA    |
| Normal   | NA    | NA     | NA      | NA    |
| Diabetes | 30-40 | Male   | >24     | 10    |
| Normal   | 50-60 | Male   | >24     | NA    |
| Normal   | 40-50 | Male   | >24     | 5.3   |
| Normal   | 50-60 | Female | >24     | 5.8   |
| Diabetes | 40-50 | Male   | 18.5-24 | 6.2   |
| Normal   | 40-50 | Male   | 18.5-24 | 5.3   |
| Normal   | 40-50 | Male   | >24     | 5.4   |
| Diabetes | 50-60 | Male   | >24     | 6.7   |
| Diabetes | 50-60 | Male   | >24     | 7     |
| Normal   | 40-50 | Male   | >24     | 5     |
| Normal   | 40-50 | Male   | >24     | 5     |

NA: not available
